# Supplementary material
Source: Elsevier journal article supplement (https://www.sciencedirect.com/science/article/pii/S2173578618300209)
Supplement: mmc1 [file S2173578618300209:mmc1.pdf]

## **The Role of Cognitive Training in Endourology: a Randomised Controlled Trial**

### **Post Study Questionnaire**

The following questions are based on the training you have received during the previous two sessions. Please answer all the questions that apply to you. By answering the questions and submitting the questionnaire you are giving permission for us to use the data provided in our study.

**Have you ever assisted in surgery, if so how many times?**

**How useful did you find the URO Mentor Simulation practice in preparation for the assessment task, on a scale of 1 to 10 (with 1 being completely useless and 10 being highly useful)?**

1      2      3      4      5      6      7      8      9      10

**How difficult were the tasks on the URO Mentor when practicing, on a scale of 1 to 10 (with 1 being very easy and 10 being extremely difficult)?**

1      2      3      4      5      6      7      8      9      10

**How useful did you find your preparation for the assessment task, on a scale of 1 to 10 (with 1 being completely useless and 10 being highly useful)?**

1      2      3      4      5      6      7      8      9      10

**How difficult did you find the assessment task, on a scale of 1 to 10 (with 1 being extremely easy and 10 being highly difficult)?**

1      2      3      4      5      6      7      8      9      10

**How confident do you feel to carry out an Ureteroscopy case, on a scale of 1 to 10 (with 1 being not confident at all and 10 being highly confident)?**

1      2      3      4      5      6      7      8      9      10

The rest of the questions apply to the mental imagery training you received (only mental imagery group)

**How easily could you 'see' yourself performing the Ureteroscopy case, on a scale of 1 to 10 (with 1 being not at all and 10 being very easily)?**

1      2      3      4      5      6      7      8      9      10

**How vivid and clear are the images of the Ureteroscopy case in your mind, on a scale of 1 to 10 (with 1 being not vivid/clear at all and 10 being very vivid/clear)?**

1      2      3      4      5      6      7      8      9      10

**How easily could you 'feel' yourself doing the procedure, on a scale of 1 to 10 (with 1 being not at all and 10 being very easily)?**

1      2      3      4      5      6      7      8      9      10

**How easily would you be able to talk someone through the steps of a Ureteroscopy case, on a scale of 1 to 10 (with 1 being not at all and 10 being very easily)?**

1      2      3      4      5      6      7      8      9      10
